# Supplementary material for: Stabilization of the Li metal anode through constructing a LiZn alloy/polymer hybrid protective layer towards uniform Li deposition
Source: Royal Society of Chemistry journal article supplement (doi:10.1039/d2cp04787j), 2022-11-21
Supplement: d2cp04787j1.pdf [file d2cp04787j1.pdf]

# Stabilize Li metal anode through constructing LiZn alloy/polymer hybrid protective layer towards uniform Li deposition

Zihao Wang<sup>a,b</sup>, Zhicui Song<sup>a,b</sup>, Yuchi Liu<sup>a,b</sup>, Jianxiong Xing<sup>a,b</sup>, Chaohui Wei<sup>a</sup>, Wei Zou<sup>c</sup>, Jingze Li<sup>a,b\*</sup>,

<sup>a</sup> Yangtze Delta Region Institute (Huzhou), University of Electronic Science and Technology of China, Huzhou 313001, P. R. China

<sup>b</sup> School of Materials and Energy, University of Electronic Science and Technology of China, Chengdu 611731, P. R. China

<sup>c</sup> Research and Development Center, Tianqi Lithium Co., Ltd., Chengdu 610093, P. R. China

Corresponding author E-mail: [lijingze@uestc.edu.cn](mailto:lijingze@uestc.edu.cn) (J. Z. Li)

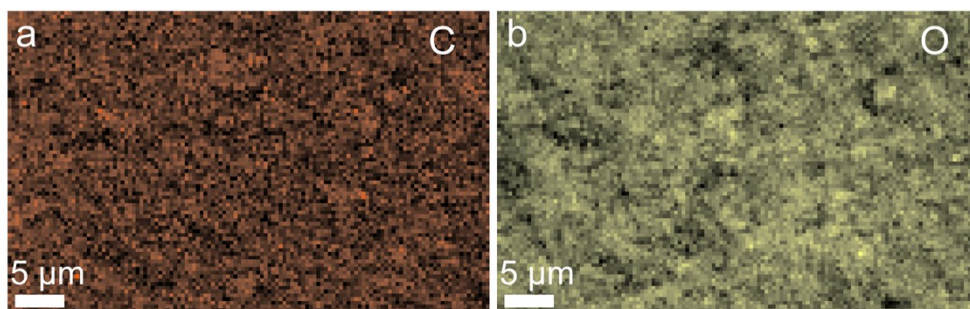

Fig. S1. The corresponding (a) C and (b) O signals of EDS mapping on the Li@LZP surface.

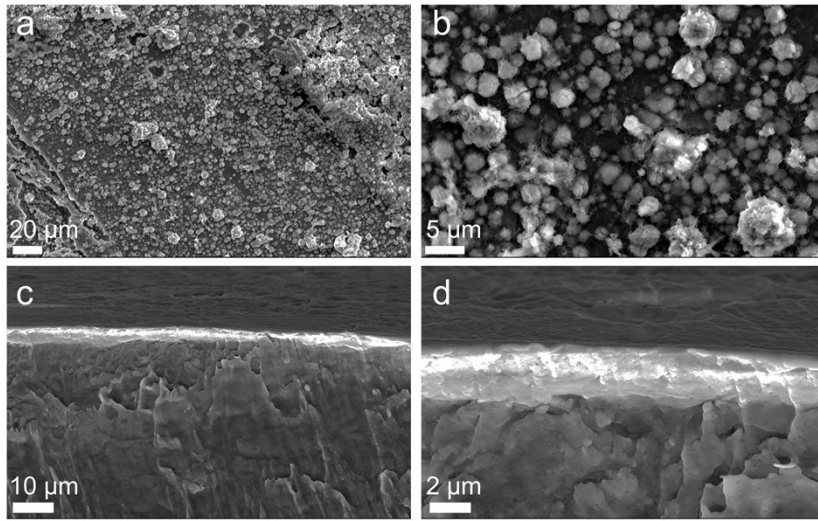

Fig. S2. (a, b) The top-view and (c, d) side-view SEM image of the Li@LiZn anode showing LiZn alloy particles.

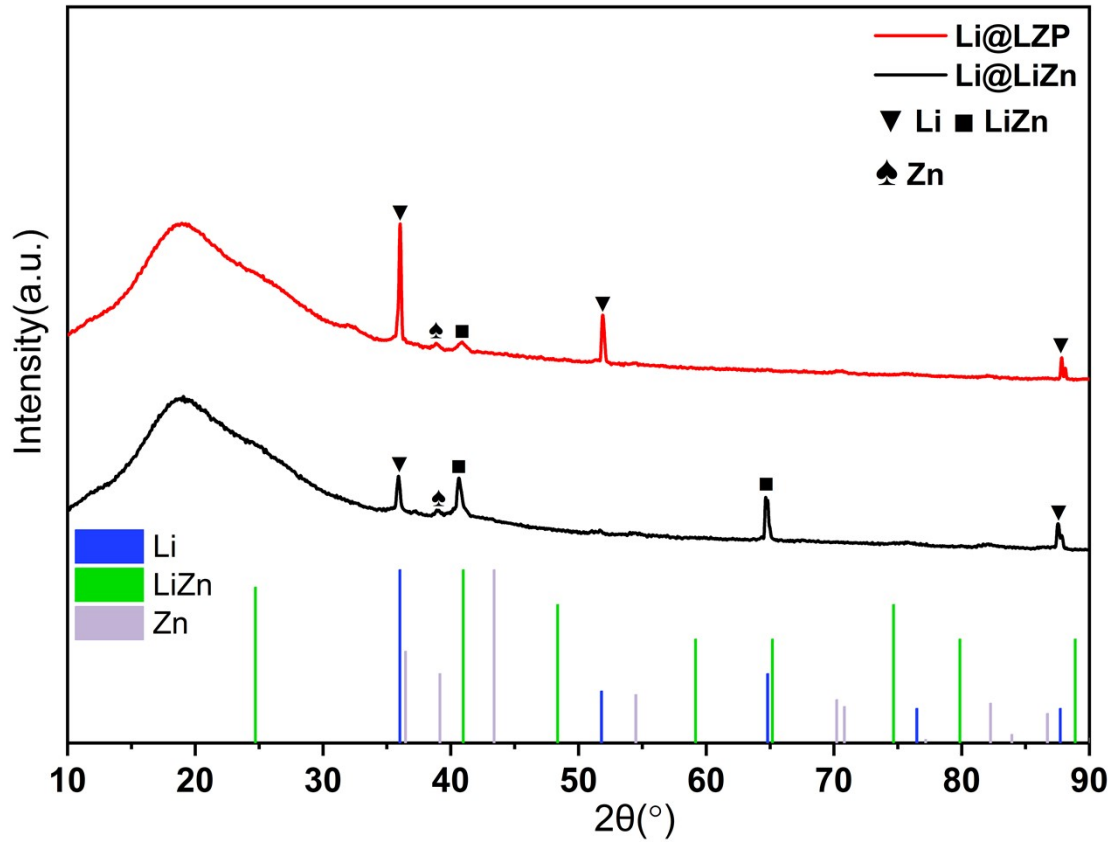

Fig. S3. The XRD pattern of Li@LiZn and Li@LZP electrode.

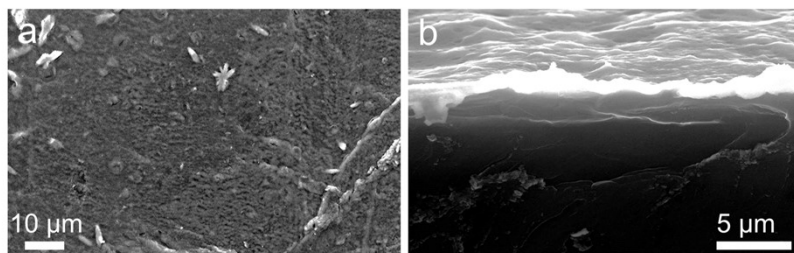

Fig. S4. The (a) top-view and (b) side-view SEM image of Li@LZP after stripping  $3 \text{ mAh cm}^{-2}$  Li.

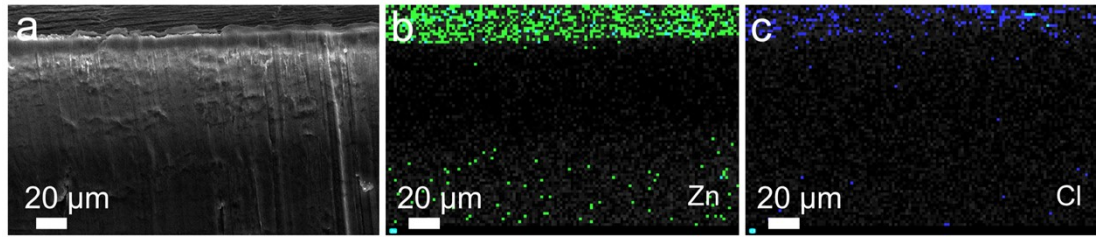

Fig. S5 (a) The cross-sectional SEM images of Li deposition on Li@LZP with a plating capacity of 3 mA h cm<sup>-2</sup> at 1 mA cm<sup>-2</sup> (Fig. 2f). The (b) Zn and Cl signals in the cross-sectional EDS mapping images of Fig. 2f.

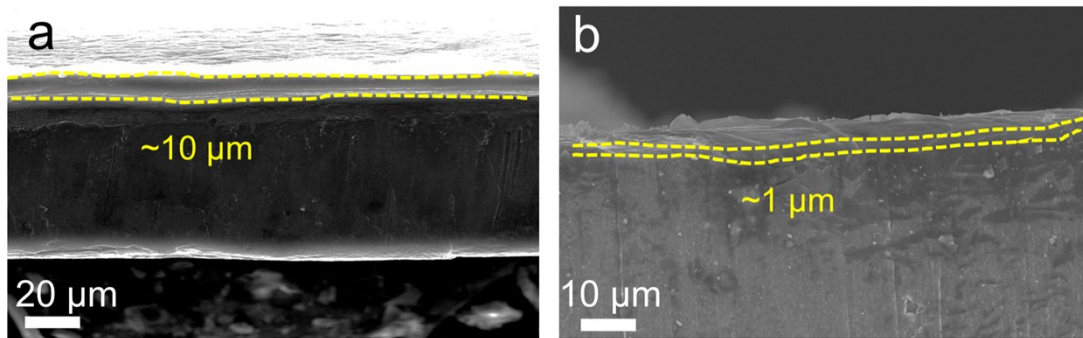

Fig. S6 The side-view SEM images of hybrid layer with different thickness of (a) 10 μm and (b) 1 μm.

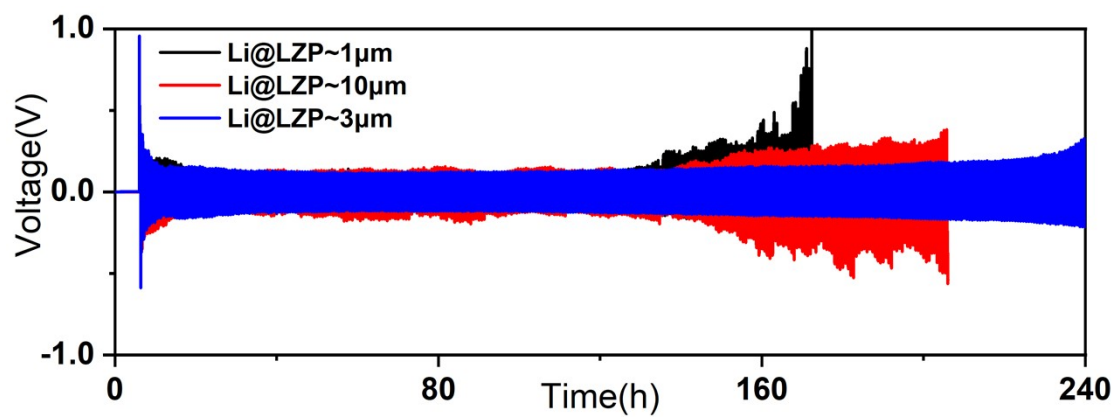

Fig. S7 The voltage profiles of symmetric cells with different thickness for hybrid layer at  $3 \text{ mA cm}^{-2}$  and  $1 \text{ mA h cm}^{-2}$ .



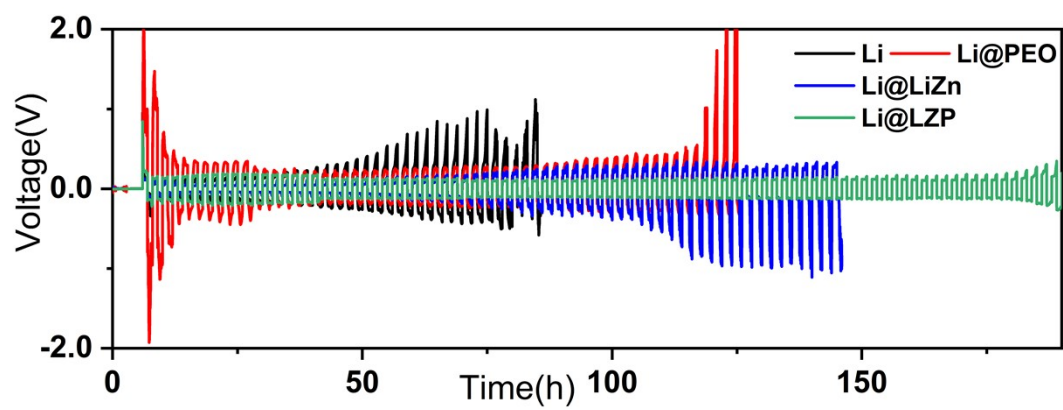

Fig. S8 Cycling performance of the symmetric cells with Li, Li@PEO, Li@LiZn and Li@LZP anode under a condition of  $3 \text{ mA cm}^{-2}$  and  $3 \text{ mA h cm}^{-2}$ .

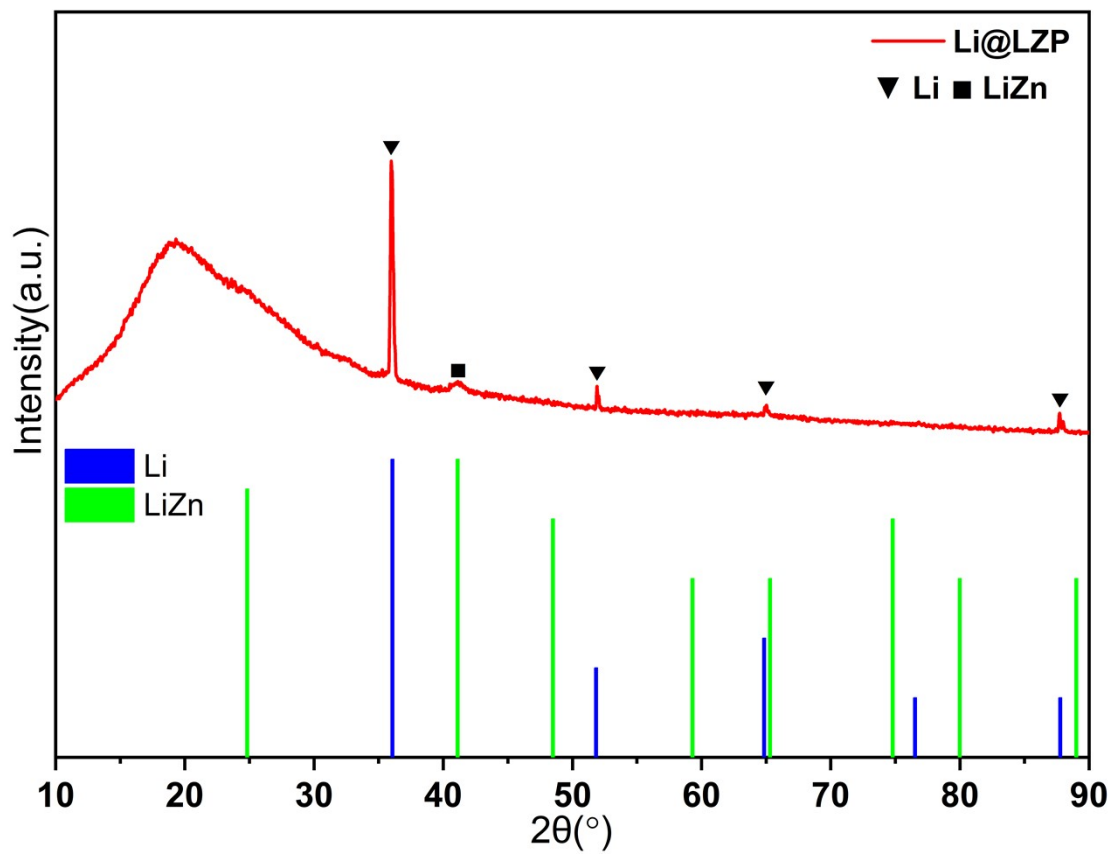

Fig. S9. The XRD pattern of Li@LZP anode after 50 cycles under a condition of  $1 \text{ mA cm}^{-2}$  and  $1 \text{ mAh cm}^{-2}$ .

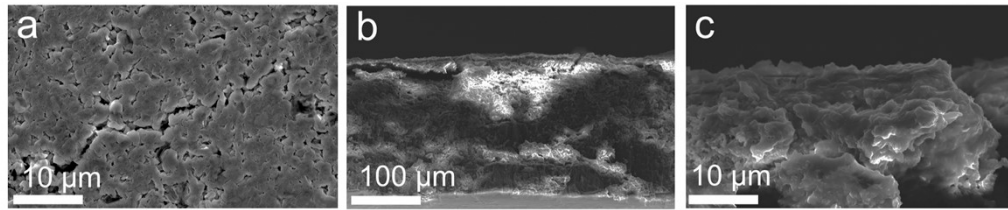

Fig. S10. The (a) top-view and (b-c) side-view morphology of Li@LiZn anode after 50 cycles under a condition of  $1 \text{ mA cm}^{-2}$  and  $1 \text{ mAh cm}^{-2}$ .

Table S1. The comparison between Li@LZP and other treated Li anodes reported in the previous literatures.

|                 | Current density & capacity                                                                       | Cycling time    | Reference |
|-----------------|--------------------------------------------------------------------------------------------------|-----------------|-----------|
| Li/Zn           | 1 mA cm <sup>-2</sup> , 1 mAh cm <sup>-2</sup><br>3 mA cm <sup>-2</sup> , 1 mAh cm <sup>-2</sup> | 500 h<br>200 h  | 1         |
| Li double-layer | 1 mA cm <sup>-2</sup> , 1 mAh cm <sup>-2</sup>                                                   | 500 h           | 2         |
| Li@(EBC-LiTFSI) | 1 mA cm <sup>-2</sup> , 1 mAh cm <sup>-2</sup><br>2 mA cm <sup>-2</sup> , 1 mAh cm <sup>-2</sup> | 500 h<br>220 h  | 3         |
| Li-LiI          | 1 mA cm <sup>-2</sup> , 1 mAh cm <sup>-2</sup>                                                   | 700 h           | 4         |
| ZPO-Li          | 1 mA cm <sup>-2</sup> , 1 mAh cm <sup>-2</sup><br>3 mA cm <sup>-2</sup> , 1 mAh cm <sup>-2</sup> | 600 h<br>210 h  | 5         |
| PAA-Li          | 1 mA cm <sup>-2</sup> , 1 mAh cm <sup>-2</sup>                                                   | 250 h           | 6         |
| LiF/PEO         | 1 mA cm <sup>-2</sup> , 1 mAh cm <sup>-2</sup>                                                   | 1000 h          | 7         |
| w/U-CD          | 1 mA cm <sup>-2</sup> , 1 mAh cm <sup>-2</sup>                                                   | 250 h           | 8         |
| LMCA            | 0.5 mA cm <sup>-2</sup> , 1 mAh cm <sup>-2</sup>                                                 | 650 h           | 9         |
| Li@LZP          | 1 mA cm <sup>-2</sup> , 1 mAh cm <sup>-2</sup><br>3 mA cm <sup>-2</sup> , 1 mAh cm <sup>-2</sup> | 1050 h<br>240 h | This work |

References:

1. J. Deng, Y. Wang, S. Qu, Y. Liu, W. Zou, F. Zhou, A. Zhou and J. Li, *Batteries & Supercaps*, 2020, **4**, 140-145.
2. Y. Zhang, G. Wang, L. Tang, J. Wu, B. Guo, M. Zhu, C. Wu, S. X. Dou and M. Wu, *Journal of Materials Chemistry A*, 2019, **7**, 25369-25376.
3. K. Li, Y. Wang, W. Jia, S. Qu, Z. Yao, R. Cui, W. Zou, F. Zhou and J. Li, *ACS Appl Mater Interfaces*, 2020, **12**, 2285-2292.
4. Y. Lin, Z. Wen, J. Liu, D. Wu, P. Zhang and J. Zhao, *Journal of Energy Chemistry*, 2021, **55**, 129-135.
5. X. Wang, J. Zhuang, M. Liu, C. Wang, Y. Zhong, H. Wang, X. Cheng, S. Liu, G. Cao and W. Li, *Journal of Materials Chemistry A*, 2019, **7**, 19104-19111.
6. N. W. Li, Y. Shi, Y. X. Yin, X. X. Zeng, J. Y. Li, C. J. Li, L. J. Wan, R. Wen and Y. G. Guo, *Angew. Chem. Int. Ed. Engl.*, 2018, **57**, 1505-1509.
7. C. Fu and C. Battaglia, *ACS Appl Mater Interfaces*, 2020, **12**, 41620-41626.
8. D. Hong, Y. Choi, J. Ryu, J. Mun, W. Choi, M. Park, Y. Lee, N.-S. Choi, G. Lee, B.-S. Kim and S. Park, *Journal of Materials Chemistry A*, 2019, **7**, 20325-20334.
9. Y. Liang, Y. Xiao, C. Yan, R. Xu, J.-F. Ding, J. Liang, H.-J. Peng, H. Yuan and J.-Q. Huang, *Journal of Energy Chemistry*, 2020, **48**, 203-207.
